# Supplementary material for: Colloidal Zn3X2 (X = P, As) quantum dots with metal salts and their transformation into (InyZn1−y)3X2via cation-exchange reactions
Source: Royal Society of Chemistry journal article supplement (doi:10.1039/d1nr02334a), 2021-01-01
Supplement: d1nr02334a1.pdf [file d1nr02334a1.pdf]

# Colloidal $\text{Zn}_3\text{X}_2$ ( $\text{X} = \text{P}, \text{As}$ ) Quantum Dots with Metal Salts and Their Transformation into $(\text{In}_y\text{Zn}_{1-y})_3\text{X}_2$ via Cation-Exchange Reactions

Seungmin Baek,<sup>c</sup> Jin-Soo Ha<sup>a</sup>, Sungwoo Kim<sup>b\*</sup>, and Sang-Wook Kim<sup>a\*</sup>

a. Department of Molecular Science and Technology, Ajou University, Suwon 16499, Republic of Korea.

b. Samsung Advanced Institute of Technology, Samsung Electronics, Suwon, Republic of Korea.

c. Department of Chemical Engineering, College of Engineering, Kyung Hee University, Yongin 17104, Republic of Korea

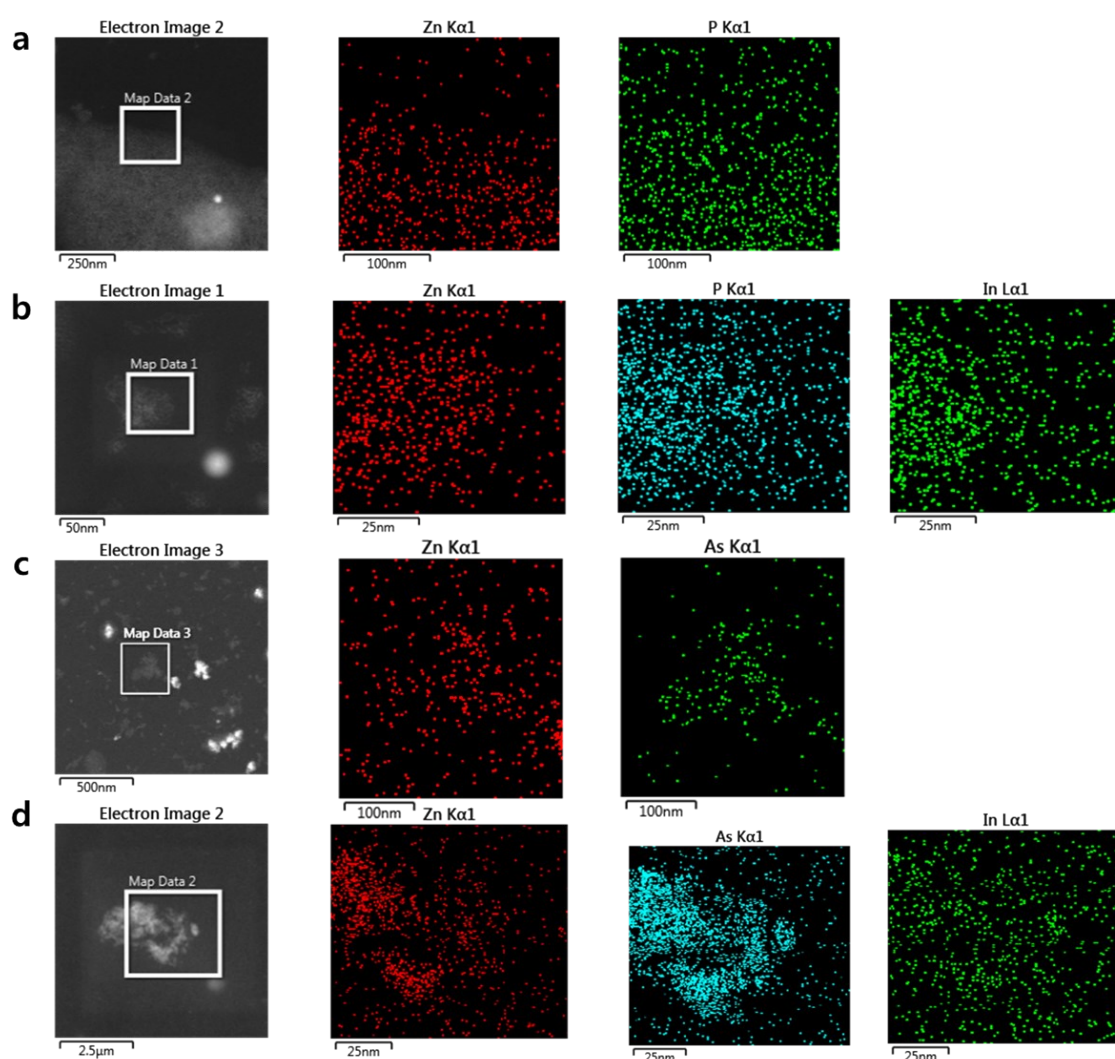

**Figure S1.** STEM-mapping data of (a)  $\text{Zn}_3\text{P}_2$  QDs, (b)  $(\text{InZn})_3\text{P}_2$  QDs, (c)  $\text{Zn}_3\text{As}_2$  QDs and (d)  $(\text{InZn})_3\text{As}_2$  QDs.

\*E-mail: [swkim@ajou.ac.kr](mailto:swkim@ajou.ac.kr)

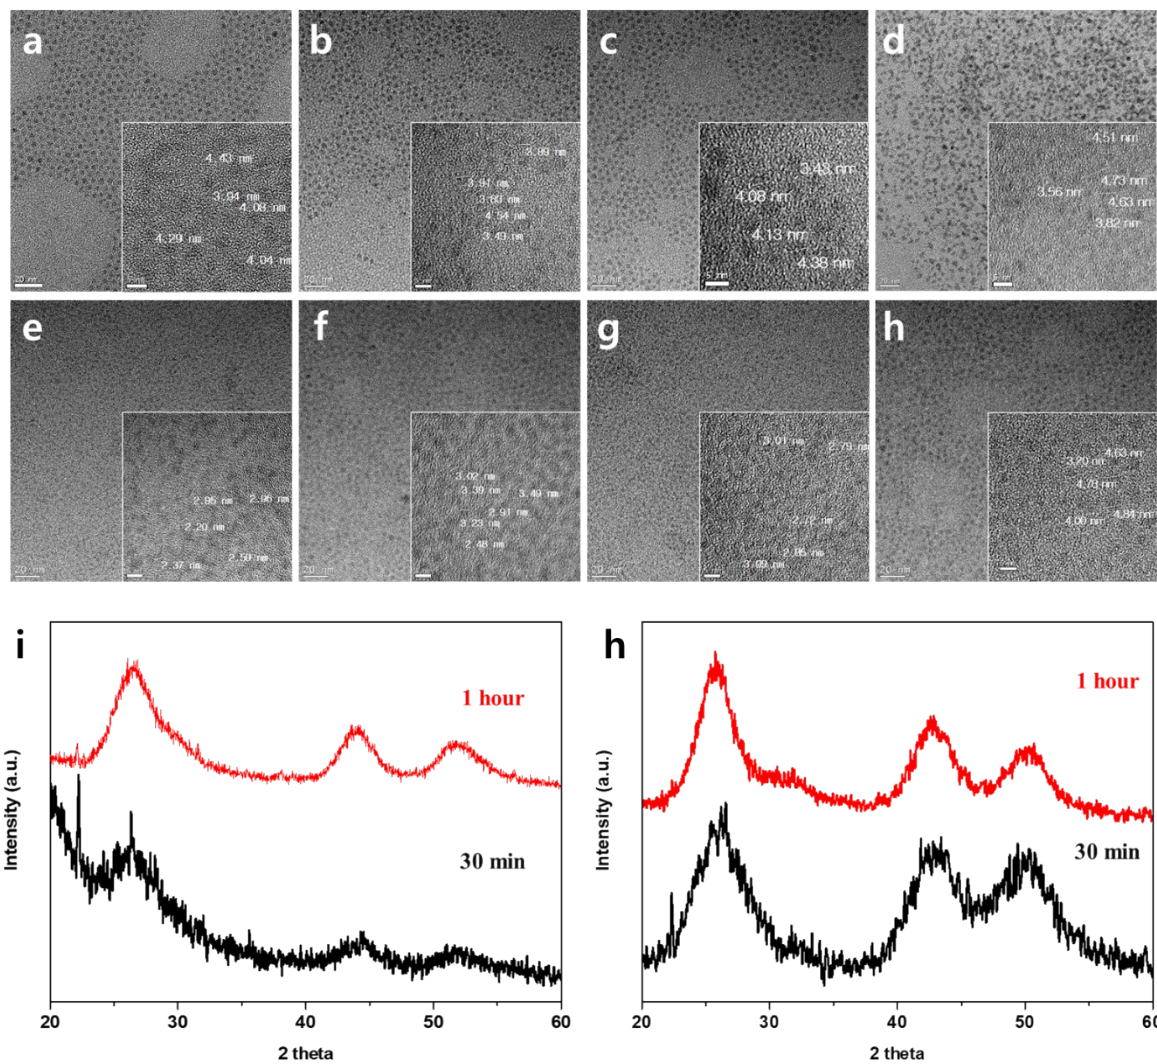

**Figure S2.** TEM data of  $(\text{InZn}_{1-y}\text{P}_{1-y/3}\text{As}_2)_y$  QD and  $(\text{InZn}_{1-y}\text{P}_{1-y/3})_y$  QD according to the growth time under 50% indium addition. (a) 1 min (b) 15 min, (c) 30 min and (d) 60 min for  $(\text{InZn}_{1-y}\text{P}_{1-y/3})_y$  QD, (e) 1 min (f) 15min, (g) 30 min and (h) 60 min for  $(\text{InZn}_{1-y}\text{P}_{1-y/3}\text{As}_2)_y$  QD. XRD data on 30 min and 1 h growth time (i)  $(\text{InZn}_{1-y}\text{P}_{1-y/3})_y$  QDs, (e)  $(\text{InZn}_{1-y}\text{P}_{1-y/3}\text{As}_2)_y$  QDs.

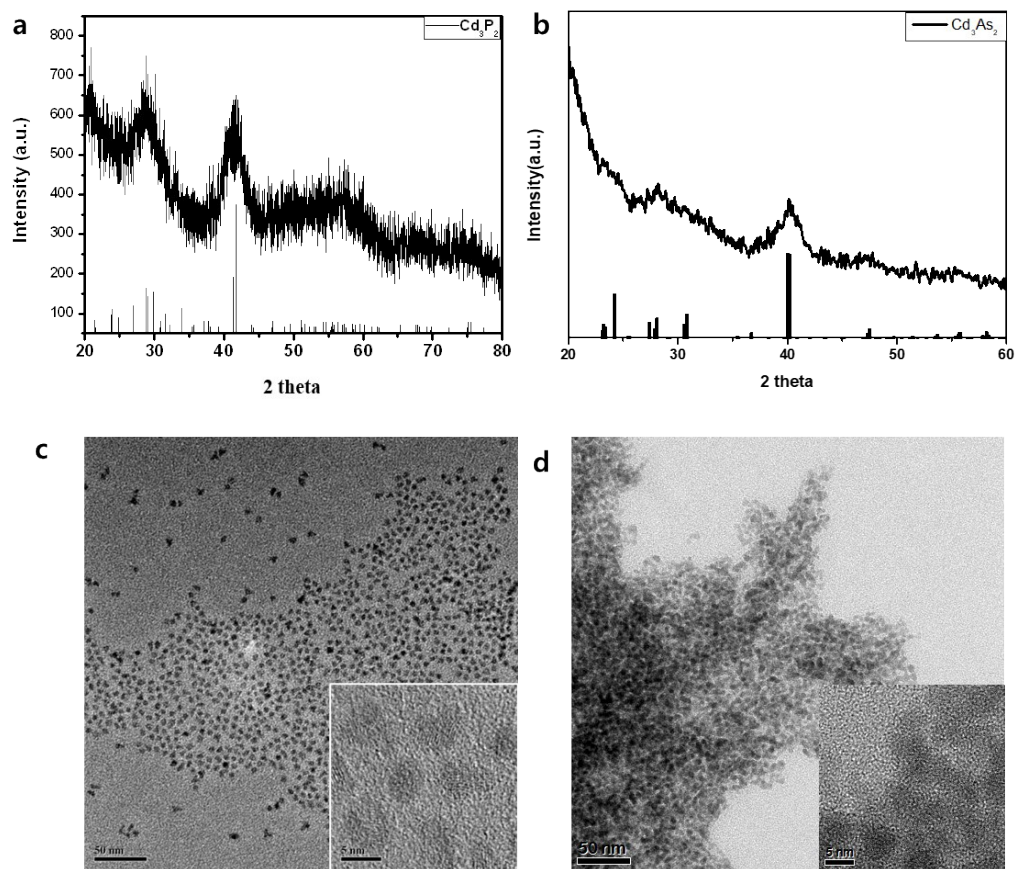

**Figure S3.** XRD data for (a)  $(\text{Cd}_{1-y}\text{Zn}_y)_3\text{P}_2$  QDs, (b)  $(\text{Cd}_{1-y}\text{Zn}_y)_3\text{As}_2$  QDs. TEM images of (c)  $(\text{Cd}_{1-y}\text{Zn}_y)_3\text{P}_2$  QDs, (d)  $(\text{Cd}_{1-y}\text{Zn}_y)_3\text{As}_2$  QDs,
